# Supplementary material for: The Probiotic Streptococcus salivarius M18 Increases Plasma Nitrite but Does Not Alter Blood Pressure: A Pilot Randomised Controlled Trial
Source: MDPI journal article supplement (doi:10.3390/applmicrobiol3030054), 2023-07-13
Supplement: s1 [file s1]

Archive with 3 entries (3 files):
- Supplementary File S1 - UWS Medical Questionnaire.pdf
- Supplementary File S2 - Inclusion-exclusion criteria.pdf
- Supplementary File S3 - CONSORT_checklist .pdf
