# Supplementary material for: The Probiotic Streptococcus salivarius M18 Increases Plasma Nitrite but Does Not Alter Blood Pressure: A Pilot Randomised Controlled Trial
Source: MDPI journal article supplement (doi:10.3390/applmicrobiol3030054), 2023-07-13
Supplement: s1 [file s1]

## Supplementary File S2 – Inclusion/Exclusion criteria

| Inclusion criteria                                                                                                      | Exclusion criteria                                                                                                         |
|-------------------------------------------------------------------------------------------------------------------------|----------------------------------------------------------------------------------------------------------------------------|
| Male                                                                                                                    | Not biologically male                                                                                                      |
| BMI in the “ideal” category - 18.5 to 24.9 kg/m <sup>2</sup> ( <a href="#">NHS UK</a> )                                 | BMI out with the ideal range                                                                                               |
| No presence of chronic conditions (confirmed by a medical questionnaire, Supplementary file 1)                          | Presence of a chronic health condition                                                                                     |
| Good oral health (confirmed by the <a href="#">WHO Oral Health Questionnaire for Adults – Annex 7 pages 111 - 114</a> ) | Presence of oral disease                                                                                                   |
| Non-smoker                                                                                                              | Current smoker                                                                                                             |
| Free from non-prescription drugs                                                                                        | Use of non-prescription drugs known to interfere with nitrate metabolism, e.g., those which alter stomach acid production  |
| Free from prescription medication                                                                                       | Use of prescribed medication                                                                                               |
| Free from use of antibacterial mouthwash, antibiotics, and probiotics for 6 months prior to enrolment                   | Use of antibacterial mouthwash, antibiotics, or probiotics for at least 6 months prior to study commencement or throughout |
| 18 – 50 years old                                                                                                       | <18 or >50 years old                                                                                                       |
